# Supplementary material for: Low voltage, low cost, flexible and balanced ambipolar OFETs based on Br2PTCDI-C18/CuPc fabricated on an Al foil gate substrate with good ambient stability
Source: Royal Society of Chemistry journal article supplement (doi:10.1039/c6tc02315k), 2016-01-01
Supplement: c6tc02315k1.pdf [file c6tc02315k1.pdf]

## **Electronic Supplementary Information**

### **Low voltage, low cost, flexible and balanced ambipolar OFETs based on Br<sub>2</sub>PTCDI-C18/CuPc fabricated on Al foil gate substrates with good ambient stability**

Suresh Vasimalla,<sup>a</sup> Nimmakayala V. V. Subbarao<sup>b</sup> and Parameswar Krishnan Iyer<sup>\*a,b</sup>

\*Email: pki@iitg.ernet.in

#### **Table of contents**

|                                                                                                                 |           |
|-----------------------------------------------------------------------------------------------------------------|-----------|
| <b>1. Leakage Current and Capacitance curves of MIM structures</b>                                              | <b>S2</b> |
| <b>2. Summary of electrical parameters of the PMMA/PVA dielectric based OFET<br/>in vacuum conditions</b>       | <b>S2</b> |
| <b>3. Dual sweep transfer characteristics of the OFET using PMMA/PVA dielectric</b>                             | <b>S3</b> |
| <b>4. Long term stability of the PMMA/PVA dielectric based OFET<br/>in vacuum conditions</b>                    | <b>S3</b> |
| <b>5. Summary of electrical parameters of the PMMA/PVA dielectric based OFET<br/>in humidity conditions</b>     | <b>S4</b> |
| <b>6. Summary of electrical parameters of the C-PVA dielectric based OFET<br/>in vacuum conditions</b>          | <b>S4</b> |
| <b>7. Stability of C-PVA dielectric based Ambipolar organic field effect transistor<br/>in vacuum condition</b> | <b>S4</b> |

## 1. Leakage Current and Capacitance curves of MIM structures

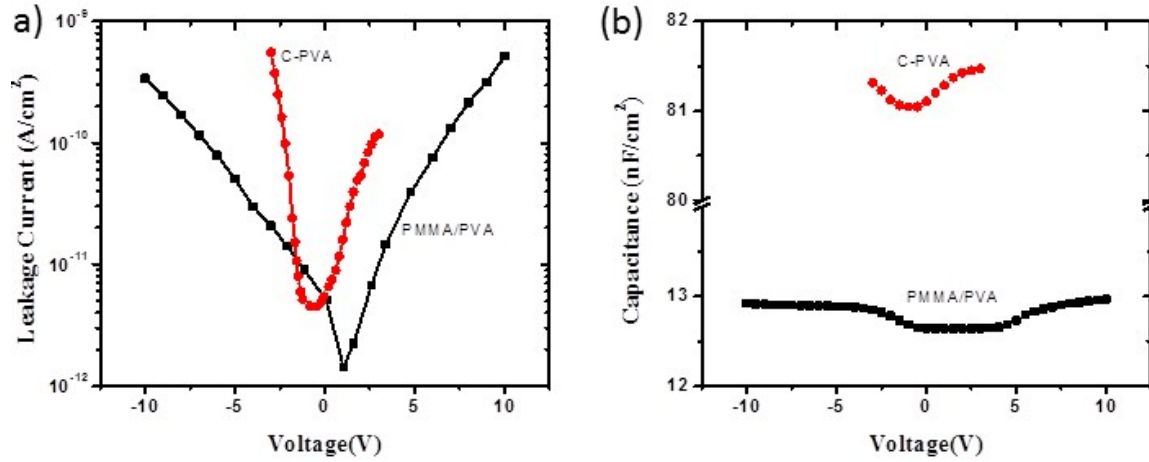

**Figure S1.** (a) I-V characteristics of bilayer polymer (PMMA/PVA) dielectrics and cross-linked PVA (C-PVA) dielectric materials. (b) Capacitance of polymer dielectrics films. Measurements were carried out at 100 kHz.

**2. Table S1.** Summary of the electrical parameters of the PMMA/PVA dielectric based organic field effect transistor measured under vacuum conditions.

| Device | V <sub>DS</sub> | $\mu(\text{cm}^2/\text{Vs})$ | V <sub>Th</sub> (V) | S(V/dec) | I <sub>on/off</sub> × 10 |
|--------|-----------------|------------------------------|---------------------|----------|--------------------------|
| n-type | 10              | $8.8 \times 10^{-5}$         | -7.25               | 8.52     | 1                        |
|        | 8               | $2.6 \times 10^{-3}$         | -2.01               | 5.02     | 1                        |
|        | 6               | $1.2 \times 10^{-2}$         | 1.11                | 3.14     | 2                        |
|        | 4               | $2.5 \times 10^{-3}$         | 0.66                | 1.01     | 2                        |
| p-type | -10             | $2.7 \times 10^{-3}$         | -4.98               | 6.75     | ~1                       |
|        | -8              | $3.4 \times 10^{-3}$         | -3.64               | 3.13     | ~1                       |
|        | -6              | $5.5 \times 10^{-3}$         | -2.52               | 2.25     | 1.5                      |
|        | -4              | $7.3 \times 10^{-3}$         | 0.85                | 1.21     | 1.5                      |

### 3. Dual sweep transfer characteristics of the OFET using PMMA/PVA dielectric

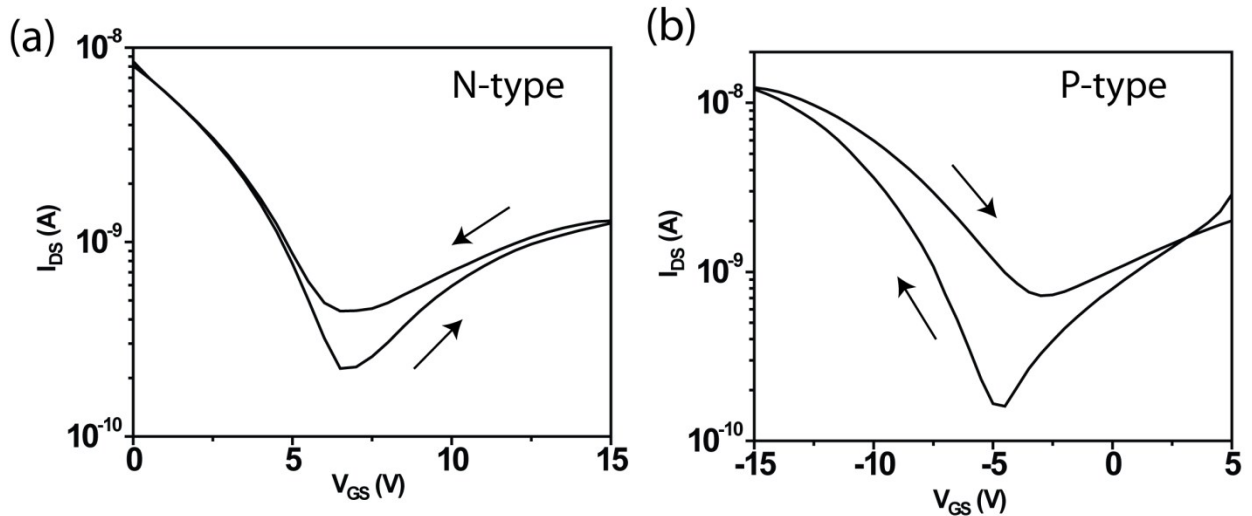

**Figure S2.** Dual sweep transfer characteristics of the ambipolar device fabricated using PMMA/PVA as the dielectric material (a) n-type (b) p-type measured under vacuum conditions.

### 4. Long term stability of the PMMA/PVA dielectric based OFET in vacuum conditions

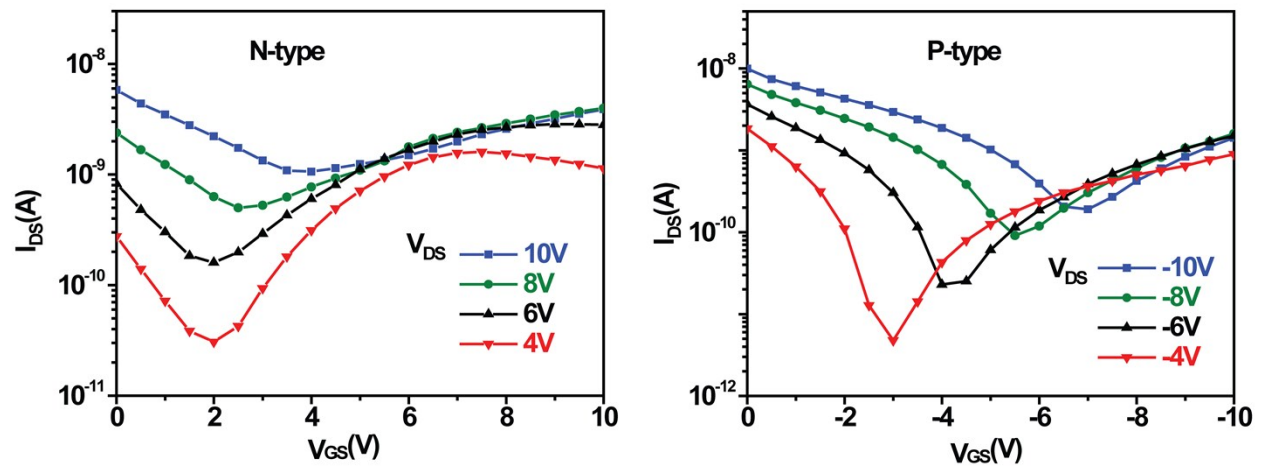

**Figure S3.** Transfer characteristics of the ambipolar device fabricated using PMMA/PVA as the dielectric material (c) n-type (d) p-type measured after 8 months under vacuum conditions.

**5. Table S2.** Summary of the electrical parameters of the PMMA/PVA dielectric based organic field effect transistor measured under humidity conditions.

| Device | $V_{DS}$ | $\mu(\text{cm}^2/\text{Vs})$ | $V_{Th}(\text{V})$ | $S(\text{V}/\text{dec})$ | $I_{on/off} \times 10^3$ |
|--------|----------|------------------------------|--------------------|--------------------------|--------------------------|
| n-type | 10       | $5.4 \times 10^{-4}$         | -1                 | 0.63                     | 1.63                     |
| p-type | -10      | $2.1 \times 10^{-3}$         | 0.6                | 1.85                     | 0.21                     |

**6. Table S3.** Summary of the electrical parameters of the C-PVA dielectric based organic field effect transistor measured under vacuum conditions.

| Device | $V_{DS}$ | $\mu(\text{cm}^2/\text{Vs})$ | $V_{Th}(\text{V})$ | $S(\text{V}/\text{dec})$ | $I_{on/off} \times 10$ |
|--------|----------|------------------------------|--------------------|--------------------------|------------------------|
| n-type | 3        | $2.3 \times 10^{-4}$         | 0.35               | 1.60                     | 1                      |
|        | 2        | $2.0 \times 10^{-4}$         | 0.75               | 0.81                     | 2                      |
| p-type | -3       | $3.0 \times 10^{-4}$         | -0.81              | 1.60                     | $\sim 1$               |
|        | -2       | $3.4 \times 10^{-4}$         | -1.62              | 0.82                     | 1.5                    |

**7. Stability of C-PVA dielectric based Ambipolar organic field effect transistor in vacuum conditions**

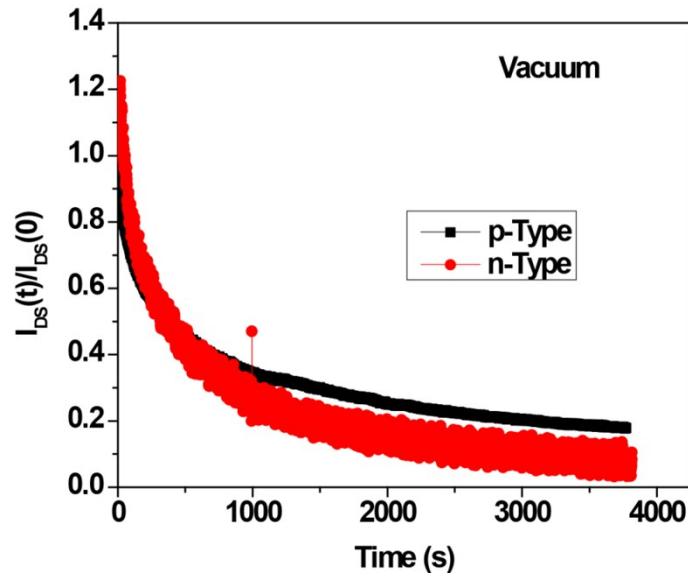

**Figure S4.** Time-dependent  $I_{DS}$  decay under a constant bias stress under vacuum conditions for the ambipolar organic field-effect transistors fabricated using C-PVA as the dielectric material. Both n-type and p-type transports measured for 1h.
